# Supplementary material for: Coordination-Engineered Ru-Nb2O5 Nanoreactor Integrated with Histidine-Functionalized Graphene Quantum Dot for Ultrasensitive and Selective Electrochemical Detection of Ascorbic Acid in Fresh Juices
Source: Research Square preprint supplement (doi:10.21203/rs.3.rs-6776326/v1), 2025-06-05
Supplement: Supplementary file 1 [file a5f1709f7ac0d6c7d004d00a.docx]

**Coordination-Engineered Ru-Nb2O₅ Nanoreactor Integrated with Histidine-Functionalized Graphene Quantum Dot for Ultrasensitive and Selective Electrochemical Detection of Ascorbic Acid in Fresh Juices**

**Wang Ye, Li Xiaoshan, Li Ruiyi and Li Zaijun***

*Key Laboratory of Synthetic and Biological Colloids, Ministry of Education, School of Chemical and Material Engineering, School of Life Science and Health Engineering, Jiangnan University, Wuxi 214122, China*

## **Reagents and materials**

Tantalum pentachloride (TaCl5) in n-butanol was purchased from Hunan Huajing powdery Material Science & Technological Co., Ltd. Histidine, citric acid, RuCl4, and K4Fe(CN)6 (>99.95%) were purchased from Sigma-Aldrich Company. Phosphate-buffered solution (PBS, Na2HPO4-NaH2PO4-KCl, 0.1 M, pH 7.4) was prepared in the laboratory. The deionized (DI) water was produced by using Millipore Milli-Q grade with a resistivity of 18.2 MΩ cm-1.

Apparatus

Scanning electron microscope (SEM) was carried out in HITACHI S4800 field emission scanning electron microscope. Transmission electron microscope (TEM) were conducted on JEOL 2010 transmission electron microscope at 200 keV. High-angle annular dark field scanning transmissionbelectron microscopy (HAADF-STEM) was conducted with FEI Themis Z microscope with 200 kV accelerating voltage. STEM sample was prepared by depositing one droplet of suspension onto the Cu grid coated with lacey carbon film. The sample was prepared by dispensing a small amount of dry powder in ethanol. Then, one drop of the suspension was dropped on 300 mesh copper. The TEM grid covered with thin amorphous carbon film. X-ray diffraction (XRD) patterns were measured on X-ray D8 Advance Instrument operated at 40 kV and 20 mA and using Cu Kα radiation source with λ=0.15406 nm. X-ray photoelectron spectroscopy (XPS) were carried out in PHI 5700 ESCA spectrometer with mono chromated Al KR radiation. Raman spectrum measurement was carried out using InVia laser micro-confocal Raman spectrometer (Renishaw, England). The oxygen vacancies were characterized by electron paramagnetic resonance spectra (EPR, Bruker EMX PLUS, X-band≈9.8 GHz). UV-visible spectrum was recorded on a TU-1901 spectrometer with a DH-2000 deuterium and tungsten-halogen light source in the absorbance mode (Beijing Purkinje General Instrument Co., Ltd, China).

Electrochemical measurements

Cyclic voltammetry (CV), electrochemical impedance spectroscopy (EIS) and differential pulse voltammetry (DPV) were measured on a CHI660D electrochemical workstation. The conventional three-electrode testing system was employed for all electrochemical measurements. The sensor, Ag/AgCl electrode and platinum wire were employed as the working electrode, reference electrode and counter electrode, respectively. The EIS measurements were measured at the frequency range from 100 KHz to 1Hz with the potential amplitude of ±5 mV. The DPV parameters were set to scan rate of 4 mV s-1, 50 mV pulse amplitude, 20 ms pulse width and -0.2 V initial potential.

Figures


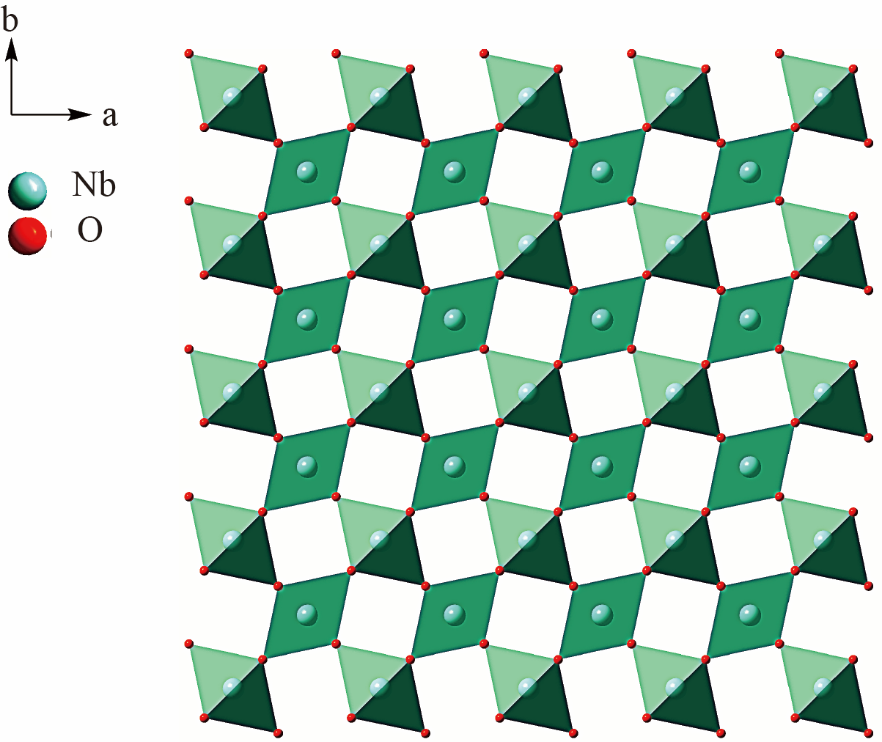


Fig. S1 Schematic structure of Ru-Nb2O5-HGQD


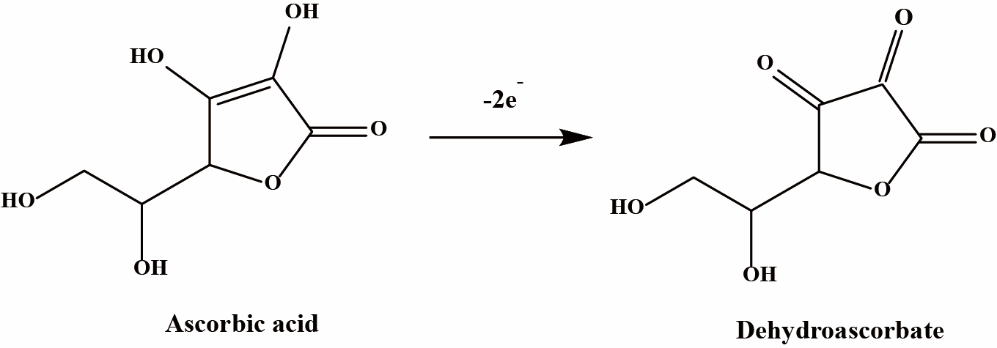


Fig. S2 One suggested reaction mechanism for catalytic oxidation of ascorbic acid


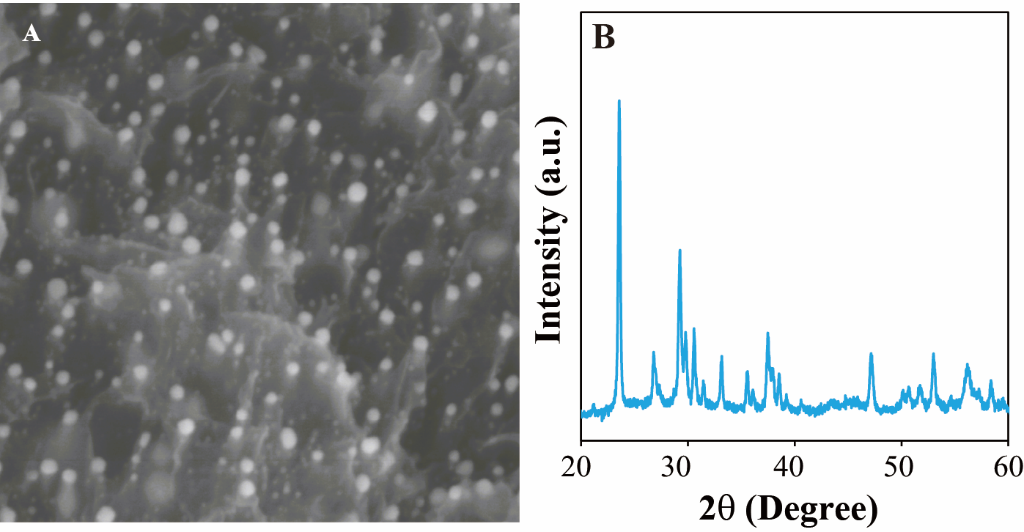


Fig. S3 SEM image (A) and XRD pattern (B) of Ru-Nb2O5-HGQD after ascorbic acid analysis
